# Supplementary material for: Plastome Structural Conservation and Evolution in the Clusioid Clade of Malpighiales
Source: PubMed Central journal article supplement (PMC7272398; doi:10.1038/s41598-020-66024-7), 2020-06-04
Supplement: 41598_2020_66024_MOESM1_ESM.pdf [file 41598_2020_66024_MOESM1_ESM.pdf]

**Article title:** Plastome Structural Conservation and Evolution in the Clusioid Clade of Malpighiales

**Submitted to:** *Scientific reports*

**Author names:** Dong-Min Jin, Jian-Jun Jin and Ting-Shuang Yi\*

\* Corresponding author

Germplasm Bank of Wild Species, Kunming Institute of Botany, Chinese Academy of Sciences, Kunming, China

tingshuangyi@mail.kib.ac.cn

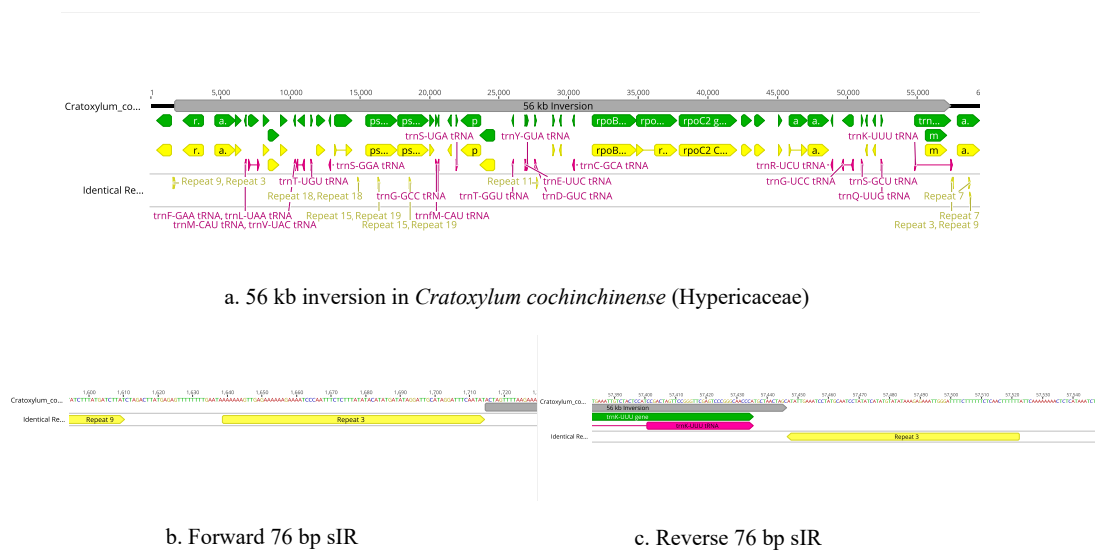

Figure S1. The 56-kb inversion in *Cratoxylum cochinchinense* (Hypericaceae). A pair of 76-bp sIRs are found at the breakpoints of the 56-kb inversion in *C. cochinchinense*.
