# Supplementary material for: Plastome Structural Conservation and Evolution in the Clusioid Clade of Malpighiales
Source: PubMed Central journal article supplement (PMC7272398; doi:10.1038/s41598-020-66024-7), 2020-06-04
Supplement: 41598_2020_66024_MOESM2_ESM.pdf [file 41598_2020_66024_MOESM2_ESM.pdf]

**Article title:** Plastome Structural Conservation and Evolution in the Clusioid Clade of Malpighiales

**Submitted to:** *Scientific reports*

**Author names:** Dong-Min Jin, Jian-Jun Jin and Ting-Shuang Yi\*

\*Corresponding author

Germplasm Bank of Wild Species, Kunming Institute of Botany, Chinese Academy of Sciences, Kunming, China

tingshuangyi@mail.kib.ac.cn

**Table S1** Details of sample collection

| Species                        | Voucher, herbarium         | Collected_by                                     | Collection_date | Country   | Identified_by | Lat_Lon            |
|--------------------------------|----------------------------|--------------------------------------------------|-----------------|-----------|---------------|--------------------|
| <i>Bonnetia paniculata</i>     | David A. Neill - 15135, MO | David A. Neill, Thomas B. Croat & Wilson Quizhpe | 4-Apr-06        | Ecuador   | D.A. Neill    | 3.58 S<br>78.44 W  |
| <i>Tristicha trifaria</i>      | W. D. Stevens - 36845, MO  | W. D. Stevens                                    | 22-Aug-15       | Nicaragua | W. D. Stevens | 12.29 N<br>85.33 W |
| <i>Marathrum foeniculaceum</i> | W. D. Stevens - 32072, MO  | W. D. Stevens & O.M. Montiel J                   | 28-Oct-11       | Nicaragua | W. D. Stevens | 12.15 N<br>84.88 W |
