# Supplementary material for: Plastome Structural Conservation and Evolution in the Clusioid Clade of Malpighiales
Source: PubMed Central journal article supplement (PMC7272398; doi:10.1038/s41598-020-66024-7), 2020-06-04
Supplement: 41598_2020_66024_MOESM3_ESM.pdf [file 41598_2020_66024_MOESM3_ESM.pdf]

**Article title:** Plastome Structural Conservation and Evolution in the Clusioid Clade of Malpighiales

**Submitted to:** *Scientific reports*

**Author names:** Dong-Min Jin, Jian-Jun Jin and Ting-Shuang Yi\*

\*Corresponding author

Germplasm Bank of Wild Species, Kunming Institute of Botany, Chinese Academy of Sciences, Kunming, China

tingshuangyi@mail.kib.ac.cn

Table S2. Summary of the log-likelihood test (LRT) results using PAML

| locus        | lnLH0      | lnLHA        | lnLHA-lnLH0 | <i>P</i> value ( $P < 0.05$ ) |
|--------------|------------|--------------|-------------|-------------------------------|
| <i>rps15</i> | -1018.2789 | -1017.496171 | 0.782697    | 0.21                          |
